# Supplementary material
Source: publisher figshare collection journal article supplement (https://frontiersin.figshare.com/ndownloader/files/31446433)
Supplement: Supplementary file 1 [file 31446433]

ReadMe file for data files: 1) Training\_data.csv and 2) Test\_data.csv

**Naïve and experienced honeybee foragers learn normally-configured flowers more easily than non-configured or highly-contrasted flowers**

Scarlett R Howard<sup>1\*</sup>, Adrian G Dyer<sup>2,3\*</sup>, Jair E Garcia<sup>2†</sup>, Martin Giurfa<sup>4†</sup>, David H Reser<sup>3,5†</sup>, Marcello G P Rosa<sup>3†</sup>, and Aurore Avarguès-Weber<sup>4</sup>

<sup>1</sup> Centre for Integrative Ecology, School of Life and Environmental Sciences, Deakin University, Burwood, VIC, Australia

<sup>2</sup> Bio-inspired Digital Sensing (BIDS) Lab, School of Media and Communication, RMIT University, Melbourne, VIC 3000, Australia

<sup>3</sup> Department of Physiology and Neuroscience Program, Biomedicine Discovery Institute, Monash University, Clayton, VIC 3800, Australia

<sup>4</sup> Centre de Recherches sur la Cognition Animale (CRCA), Centre de Biologie Intégrative (CBI), Université de Toulouse, CNRS, UPS, Toulouse 31000, France

<sup>5</sup> Monash Rural Health-Churchill, Churchill, VIC 3842, Australia

\* Authors for correspondence:

Scarlett R Howard

s.howard@deakin.edu.au

Adrian G Dyer

adrian.dyer@rmit.edu.au

† Authors listed alphabetically

This ReadMe file describes the data files accompanying the above publication. For any further queries please contact [s.howard@deakin.edu.au](mailto:s.howard@deakin.edu.au) or [adrian.dyer@rmit.edu.au](mailto:adrian.dyer@rmit.edu.au)

The following files are included:

1) "Training\_data.csv"

This file contains the raw data for each trial block (6 choices per trial block – 30 choices overall) during the conditioning phase of the experiment. The columns are as follows:

Bee\_ID: ID of individual bee

Bee\_type: A score of '1' is an experienced bee forager and a score of '2' is a naïve bee forager.

Group: A score of '1' is a bee trained on normally configured flowers, a score of '2' is a bee trained on scrambled flowers, a score of '3' is a bee trained on high-contrast flowers, and a score of '4' is a bee trained on asymmetrically scrambled flowers.

Trial block: Trial blocks 1-5.

Correct: The sum of correct choices per trial block.

Incorrect: The sum of incorrect choices per trial block.

2) "Test\_data.csv"

This file contains the raw data for each test (20 choices each) during the conditioning phase of the experiment. The columns are as follows:

Bee\_ID: ID of individual bee

Bee\_type: A score of '1' is an experienced bee forager and a score of '2' is a naïve bee forager.

Group: A score of '1' is a bee trained on normally configured flowers, a score of '2' is a bee trained on scrambled flowers, a score of '3' is a bee trained on high-contrast flowers, and a score of '4' is a bee trained on asymmetrically scrambled flowers.

Score\*100: The percentage of correct choices per bee.

Correct: The sum of correct choices.

Incorrect: The sum of incorrect choices.
